# Supplementary material for: Work-related sedentary behavior: An exploratory study of administrative staff in a university hospital
Source: Zentralbl Arbeitsmed Arbeitsschutz Ergon. 2023 Jan 9;73(1):39–47. [Article in German] doi: 10.1007/s40664-022-00489-3 (PMC9829228; doi:10.1007/s40664-022-00489-3)
Supplement: Supplementary file 1 [file 40664_2022_489_MOESM1_ESM.pdf]

# Onlinematerial

## Onlinematerial 1 Fragebogen Ergonomie und Sitzverhalten Universitätsklinikum

### Regensburg

Jede Frage kann übersprungen werden! Die Fragen zu Ergonomie (Nr. 26 – 32) können aus Urheberrechtsgründen hier nicht veröffentlicht werden.

|                                                                         |                                                                                                                                                               |              |                   |                                        |                                                        |            |
|-------------------------------------------------------------------------|---------------------------------------------------------------------------------------------------------------------------------------------------------------|--------------|-------------------|----------------------------------------|--------------------------------------------------------|------------|
| <b>Sitzverhalten</b>                                                    |                                                                                                                                                               |              |                   |                                        |                                                        |            |
| Allgemein                                                               |                                                                                                                                                               |              |                   |                                        |                                                        |            |
| 1.                                                                      | Ist Ihnen etwas über die gesundheitlichen Auswirkungen übermäßigen Sitzens bekannt?                                                                           |              |                   |                                        |                                                        |            |
|                                                                         | Ja                                                                                                                                                            |              |                   | Nein                                   |                                                        |            |
| 2.                                                                      | Welche drei Stichpunkte kommen Ihnen zum Thema Sitzzeiten spontan in den Sinn?                                                                                |              |                   |                                        |                                                        |            |
|                                                                         |                                                                                                                                                               |              |                   |                                        |                                                        |            |
| 3.                                                                      | Wie beeinflusst langes ununterbrochenes Sitzen die Gesundheit des Menschen Ihrer Meinung nach?                                                                |              |                   |                                        |                                                        |            |
|                                                                         | Negativ                                                                                                                                                       | Eher negativ | Neutral           | Eher positiv                           | Positiv                                                | Weiß nicht |
| 4.                                                                      | Ihrer Meinung nach hat das Sitzverhalten (Dauer, Unterbrechungen, etc.) einen wissenschaftlich nachgewiesenen Effekt auf...<br><i>Multiple Choice möglich</i> |              |                   |                                        |                                                        |            |
|                                                                         | Muskel- und Skelettsystem                                                                                                                                     |              |                   |                                        |                                                        |            |
|                                                                         | Körperliche Fitness                                                                                                                                           |              |                   |                                        |                                                        |            |
|                                                                         | Diabetes mellitus Typ 2                                                                                                                                       |              |                   |                                        |                                                        |            |
|                                                                         | Übergewicht                                                                                                                                                   |              |                   |                                        |                                                        |            |
|                                                                         | Herz-Kreislauf-System (z.B. Schlaganfall, Herzinfarkt)                                                                                                        |              |                   |                                        |                                                        |            |
|                                                                         | Krebs (z.B. Darmkrebs, Brustkrebs, Eierstockkrebs)                                                                                                            |              |                   |                                        |                                                        |            |
|                                                                         | Keine Effekte                                                                                                                                                 |              |                   |                                        |                                                        |            |
|                                                                         | Weiß nicht                                                                                                                                                    |              |                   |                                        |                                                        |            |
| Rahmenbedingungen an Ihrem Arbeitsplatz                                 |                                                                                                                                                               |              |                   |                                        |                                                        |            |
| 5.                                                                      | Wie viele Stunden arbeiten Sie in einer <b>typischen Woche</b> ?                                                                                              |              |                   |                                        |                                                        |            |
|                                                                         | <i>Schieberegler: min: 5 Std; max: 50 Std; Stufen: 0,5 Std</i>                                                                                                |              |                   |                                        |                                                        |            |
| 6.                                                                      | Wer nutzt Ihren Arbeitsplatz (Schreibtisch, PC)?                                                                                                              |              |                   |                                        |                                                        |            |
|                                                                         | Nur Sie                                                                                                                                                       |              |                   | In Ihrer Abwesenheit auch Kolleg*innen |                                                        |            |
| 7.                                                                      | Wie viele Kolleg*innen nutzen <b>gleichzeitig mit Ihnen</b> Ihr Büro?                                                                                         |              |                   |                                        |                                                        |            |
|                                                                         | Nur Sie                                                                                                                                                       |              | Sie + 1 Kolleg*in |                                        | Sie + 2 Kolleg*innen<br>Sie + 3 oder mehr Kolleg*innen |            |
| <b>Sitzverhalten</b>                                                    |                                                                                                                                                               |              |                   |                                        |                                                        |            |
| Persönlich – Diese Fragen beziehen sich auf einen typischen Arbeitstag. |                                                                                                                                                               |              |                   |                                        |                                                        |            |
| 8.                                                                      | Wie viele Stunden arbeiten Sie an <b>einem</b> gewöhnlichen <b>Arbeitstag</b> ?                                                                               |              |                   |                                        |                                                        |            |
|                                                                         | <i>Schieberegler: min: 1 Std.; max: 10 Std; Stufen: 0,25 Std</i>                                                                                              |              |                   |                                        |                                                        |            |

|     |                                                                                                                                                                             |                                                         |                  |    |               |              |
|-----|-----------------------------------------------------------------------------------------------------------------------------------------------------------------------------|---------------------------------------------------------|------------------|----|---------------|--------------|
| 9.  | Wie viel Zeit verbringen Sie während Ihrer Arbeitszeit an einem gewöhnlichen Arbeitstag <b>im Sitzen</b> ?                                                                  |                                                         |                  |    |               |              |
|     | <i>Schieberegler: min: 0 Std.; max: 10 Std; Stufen: 0,25 Std</i>                                                                                                            |                                                         |                  |    |               |              |
| 10. | Wie verteilt sich - <b>durchschnittlich</b> gesehen - diese Zeit im Sitzen <b>prozentual</b> auf folgende Tätigkeiten?<br><i>Die Summe muss gleich 100 % oder 0 % sein!</i> |                                                         |                  |    |               |              |
|     | PC-Arbeit (auch Videokonferenzen)                                                                                                                                           | <i>Schieberegler: min: 0 %; max: 100 %; Stufen: 5 %</i> |                  |    |               |              |
|     | Telefonate                                                                                                                                                                  | <i>Schieberegler: min: 0 %; max: 100 %; Stufen: 5 %</i> |                  |    |               |              |
|     | Besprechung mit Kolleg*innen                                                                                                                                                | <i>Schieberegler: min: 0 %; max: 100 %; Stufen: 5 %</i> |                  |    |               |              |
|     | Lesen/Schreiben auf Papier                                                                                                                                                  | <i>Schieberegler: min: 0 %; max: 100 %; Stufen: 5 %</i> |                  |    |               |              |
|     | Kurzzeitpausen                                                                                                                                                              | <i>Schieberegler: min: 0 %; max: 100 %; Stufen: 5 %</i> |                  |    |               |              |
|     | Andere Tätigkeiten                                                                                                                                                          | <i>Schieberegler: min: 0 %; max: 100 %; Stufen: 5 %</i> |                  |    |               |              |
| 11. | <b>Wie oft unterbrechen</b> Sie für gewöhnlich die sitzende Tätigkeit <b>pro Stunde</b> ?<br>Jedes noch so kurze Aufstehen zählt bereits als Unterbrechung des Sitzens.     |                                                         |                  |    |               |              |
|     | 0x                                                                                                                                                                          | 1x                                                      | 2x               | 3x | 4x            | 5x oder mehr |
| 12. | Seit der COVID-19-Pandemie und den damit einhergehenden Maßnahmen, unterbrechen Sie Ihre sitzenden Tätigkeiten pro Stunde...                                                |                                                         |                  |    |               |              |
|     | Weniger häufig                                                                                                                                                              |                                                         | Gleich häufig    |    | Häufiger      |              |
| 13. | Seit der COVID-19-Pandemie und den damit einhergehenden Maßnahmen, ist die Zeit, die Sie im Sitzen am Arbeitsplatz verbringen...                                            |                                                         |                  |    |               |              |
|     | Weniger geworden                                                                                                                                                            |                                                         | Gleich geblieben |    | Mehr geworden |              |
| 14. | <b>Wie oft wechseln</b> Sie für gewöhnlich <b>im Sitzen</b> Ihre Position <b>pro Stunde</b> (z.B. um das Gewicht zu verlagern, sich zu dehnen)?                             |                                                         |                  |    |               |              |
|     | 0x                                                                                                                                                                          | 1x                                                      | 2x               | 3x | 4x            | 5x oder mehr |
|     | <b>Stehverhalten</b><br>Persönlich                                                                                                                                          |                                                         |                  |    |               |              |
| 15. | Wie viel Zeit verbringen Sie während Ihrer Arbeitszeit an einem gewöhnlichen Arbeitstag <b>im Stehen</b> ?                                                                  |                                                         |                  |    |               |              |
|     | <i>Schieberegler: min: 0 Std.; max: 10 Std; Stufen: 0,25 Std</i>                                                                                                            |                                                         |                  |    |               |              |
| 16. | Wie verteilt sich - <b>durchschnittlich</b> gesehen - diese Zeit im Stehen <b>prozentual</b> auf folgende Tätigkeiten?<br><i>Die Summe muss gleich 100 % oder 0 % sein!</i> |                                                         |                  |    |               |              |
|     | PC-Arbeit (auch Videokonferenzen)                                                                                                                                           | <i>Schieberegler: min: 0 %; max: 100 %; Stufen: 5 %</i> |                  |    |               |              |
|     | Telefonate                                                                                                                                                                  | <i>Schieberegler: min: 0 %; max: 100 %; Stufen: 5 %</i> |                  |    |               |              |
|     | Besprechung mit Kolleg*innen                                                                                                                                                | <i>Schieberegler: min: 0 %; max: 100 %; Stufen: 5 %</i> |                  |    |               |              |
|     | Lesen/Schreiben auf Papier                                                                                                                                                  | <i>Schieberegler: min: 0 %; max: 100 %; Stufen: 5 %</i> |                  |    |               |              |
|     | Kurzzeitpausen                                                                                                                                                              | <i>Schieberegler: min: 0 %; max: 100 %; Stufen: 5 %</i> |                  |    |               |              |
|     | Andere Tätigkeiten                                                                                                                                                          | <i>Schieberegler: min: 0 %; max: 100 %; Stufen: 5 %</i> |                  |    |               |              |

|                      |                                                                                                                                                               |              |             |              |         |            |
|----------------------|---------------------------------------------------------------------------------------------------------------------------------------------------------------|--------------|-------------|--------------|---------|------------|
| 17.                  | Welche Angebote und Maßnahmen würden Sie sich im Arbeitsalltag wünschen, um Ihre Zeit im Sitzen zu reduzieren?<br><i>Multiple Choice und Freitext möglich</i> |              |             |              |         |            |
|                      | Regelmäßige Erinnerungen um Aufzustehen durch eine App/SMS                                                                                                    |              |             |              |         |            |
|                      | Regelmäßige Erinnerungen um Aufzustehen durch POP-UP/Mail am PC                                                                                               |              |             |              |         |            |
|                      | Verwendung eines Stehpultes                                                                                                                                   |              |             |              |         |            |
|                      | Stehmeeting (bis 5 Teilnehmer, kurze Dauer, Raum mit Konferenztisch in Stehhöhe)                                                                              |              |             |              |         |            |
|                      | Drucker, Abfalleimer etc. außerhalb der Reichweite im Sitzen                                                                                                  |              |             |              |         |            |
|                      | Telefonaufkleber, der daran erinnert, Telefonate im Stehen zu führen                                                                                          |              |             |              |         |            |
|                      | Beratung oder Information über einfache Mittel zur Sitzunterbrechung                                                                                          |              |             |              |         |            |
|                      | Angeleitete Bewegungsvideos am Arbeitsplatz                                                                                                                   |              |             |              |         |            |
|                      | Keine Angebote erwünscht                                                                                                                                      |              |             |              |         |            |
|                      | Ihre Ideen:                                                                                                                                                   |              |             |              |         |            |
| 18.                  | Wie würde es Ihre Vorgesetzte oder Ihr Vorgesetzter vermutlich bewerten, wenn Sie an Ihrem Arbeitsplatz stünden?                                              |              |             |              |         |            |
|                      | Negativ                                                                                                                                                       | Eher negativ | Neutral     | Eher positiv | Positiv | Weiß nicht |
| <b>Sitzverhalten</b> |                                                                                                                                                               |              |             |              |         |            |
| Arbeitsweg           |                                                                                                                                                               |              |             |              |         |            |
| 19.                  | Wie legen Sie Ihren Arbeitsweg üblicherweise <b>im Sommerhalbjahr</b> zurück?                                                                                 |              |             |              |         |            |
|                      | PKW/Motorrad/Roller                                                                                                                                           | Immer        | Überwiegend | Selten       | Nie     |            |
|                      | Bus/Bahn                                                                                                                                                      | Immer        | Überwiegend | Selten       | Nie     |            |
|                      | E-Bike                                                                                                                                                        | Immer        | Überwiegend | Selten       | Nie     |            |
|                      | Fahrrad                                                                                                                                                       | Immer        | Überwiegend | Selten       | Nie     |            |
|                      | Zu Fuß                                                                                                                                                        | Immer        | Überwiegend | Selten       | Nie     |            |
| 20.                  | Wie viel Zeit nimmt Ihr einfacher Arbeitsweg <b>im Sommerhalbjahr</b> in Anspruch?                                                                            |              |             |              |         |            |
|                      | <i>Schieberegler: min: 0 min.; max: 180 min; Stufen: 5 min</i>                                                                                                |              |             |              |         |            |
| 21.                  | Wie viel Zeit Ihres einfachen Arbeitswegs <b>im Sommerhalbjahr</b> verbringen Sie <b>im Sitzen; E-Bike und Fahrradzeiten ausgenommen</b> ?                    |              |             |              |         |            |
|                      | <i>Schieberegler: min: 0 min.; max: 180 min; Stufen: 5 min</i>                                                                                                |              |             |              |         |            |
| 22.                  | Legen Sie Ihren Arbeitsweg im Winterhalbjahr anders als im Sommerhalbjahr zurück?                                                                             |              |             |              |         |            |
|                      | Ja                                                                                                                                                            |              |             | Nein         |         |            |
| 23.                  | Wie legen Sie Ihren Arbeitsweg üblicherweise <b>im Winterhalbjahr</b> zurück?                                                                                 |              |             |              |         |            |
|                      | PKW/Motorrad/Roller                                                                                                                                           | Immer        | Überwiegend | Selten       | Nie     |            |
|                      | Bus/Bahn                                                                                                                                                      | Immer        | Überwiegend | Selten       | Nie     |            |
|                      | E-Bike                                                                                                                                                        | Immer        | Überwiegend | Selten       | Nie     |            |
|                      | Fahrrad                                                                                                                                                       | Immer        | Überwiegend | Selten       | Nie     |            |
|                      | Zu Fuß                                                                                                                                                        | Immer        | Überwiegend | Selten       | Nie     |            |
| 24.                  | Wie viel Zeit nimmt Ihr einfacher Arbeitsweg <b>im Winterhalbjahr</b> in Anspruch?                                                                            |              |             |              |         |            |
|                      | <i>Schieberegler: min: 0 min.; max: 180 min; Stufen: 5 min</i>                                                                                                |              |             |              |         |            |
| 25.                  | Wie viel Zeit Ihres einfachen Arbeitswegs <b>im Winterhalbjahr</b> verbringen Sie <b>im Sitzen; E-Bike und Fahrradzeiten ausgenommen</b> ?                    |              |             |              |         |            |
|                      | <i>Schieberegler: min: 0 min.; max: 180 min; Stufen: 5 min</i>                                                                                                |              |             |              |         |            |

| Demographie                                                                                                                                                                                                                                                                     |                                                                                                     |         |         |          |         |         |         |         |         |      |
|---------------------------------------------------------------------------------------------------------------------------------------------------------------------------------------------------------------------------------------------------------------------------------|-----------------------------------------------------------------------------------------------------|---------|---------|----------|---------|---------|---------|---------|---------|------|
| 32.                                                                                                                                                                                                                                                                             | Welchem Geschlecht fühlen Sie sich zugehörig?                                                       |         |         |          |         |         |         |         |         |      |
|                                                                                                                                                                                                                                                                                 | Weiblich                                                                                            |         |         | Männlich |         |         | Divers  |         |         |      |
| 33.                                                                                                                                                                                                                                                                             | Wie alt sind Sie?                                                                                   |         |         |          |         |         |         |         |         |      |
|                                                                                                                                                                                                                                                                                 | ≤ 20                                                                                                | 21 - 25 | 26 - 30 | 31 - 35  | 36 - 40 | 41 - 45 | 46 - 50 | 51 - 55 | 56 - 60 | > 60 |
| 34.                                                                                                                                                                                                                                                                             | Was ist Ihr höchster Bildungsabschluss?                                                             |         |         |          |         |         |         |         |         |      |
|                                                                                                                                                                                                                                                                                 | Kein Abschluss                                                                                      |         |         |          |         |         |         |         |         |      |
|                                                                                                                                                                                                                                                                                 | Mittelschulabschluss (Hauptschulabschluss, Volksschulabschluss)                                     |         |         |          |         |         |         |         |         |      |
|                                                                                                                                                                                                                                                                                 | Realschulabschluss (Mittlere Reife)                                                                 |         |         |          |         |         |         |         |         |      |
|                                                                                                                                                                                                                                                                                 | Fachhochschulreife                                                                                  |         |         |          |         |         |         |         |         |      |
|                                                                                                                                                                                                                                                                                 | Allgemeine oder fachgebundene Hochschulreife/Abitur                                                 |         |         |          |         |         |         |         |         |      |
|                                                                                                                                                                                                                                                                                 | Berufsausbildung (z.B. Lehre, Berufsfachschule)                                                     |         |         |          |         |         |         |         |         |      |
|                                                                                                                                                                                                                                                                                 | Bachelor an einer (Fach-)Hochschule                                                                 |         |         |          |         |         |         |         |         |      |
|                                                                                                                                                                                                                                                                                 | Fachhochschulabschluss (z.B. Diplom, Master)                                                        |         |         |          |         |         |         |         |         |      |
|                                                                                                                                                                                                                                                                                 | Universitätsabschluss (z.B. Master, Magister, Diplom, Staatsexamen)                                 |         |         |          |         |         |         |         |         |      |
|                                                                                                                                                                                                                                                                                 | Promotion                                                                                           |         |         |          |         |         |         |         |         |      |
|                                                                                                                                                                                                                                                                                 | Anderer Abschluss                                                                                   |         |         |          |         |         |         |         |         |      |
| <p>Die Beantwortung folgender Fragen ist <b>freiwillig</b>, wäre jedoch für die <b>wissenschaftliche Auswertung sehr hilfreich</b>.</p> <p>Größe und Gewicht werden <b>nicht gespeichert</b>, sind jedoch für die Berechnung des <b>Body-Mass-Index (BMI)</b> erforderlich.</p> |                                                                                                     |         |         |          |         |         |         |         |         |      |
| 35.                                                                                                                                                                                                                                                                             | Wie groß sind Sie?                                                                                  |         |         |          |         |         |         |         |         |      |
|                                                                                                                                                                                                                                                                                 | ___ cm                                                                                              |         |         |          |         |         |         |         |         |      |
| 36.                                                                                                                                                                                                                                                                             | Wie viel wiegen Sie?                                                                                |         |         |          |         |         |         |         |         |      |
|                                                                                                                                                                                                                                                                                 | ___ kg                                                                                              |         |         |          |         |         |         |         |         |      |
| 37.                                                                                                                                                                                                                                                                             | Hatten Sie im letzten Jahr Beschwerden hinsichtlich körperlicher und psychischer Gesundheit?        |         |         |          |         |         |         |         |         |      |
|                                                                                                                                                                                                                                                                                 | Ja                                                                                                  |         |         |          |         | Nein    |         |         |         |      |
| 38.                                                                                                                                                                                                                                                                             | Welche Beschwerden hatten Sie hinsichtlich körperlicher und psychischer Gesundheit im letzten Jahr? |         |         |          |         |         |         |         |         |      |
|                                                                                                                                                                                                                                                                                 |                                                                                                     |         |         |          |         |         |         |         |         |      |

## Onlinematerial 2 Flussdiagramm der Studienpopulation

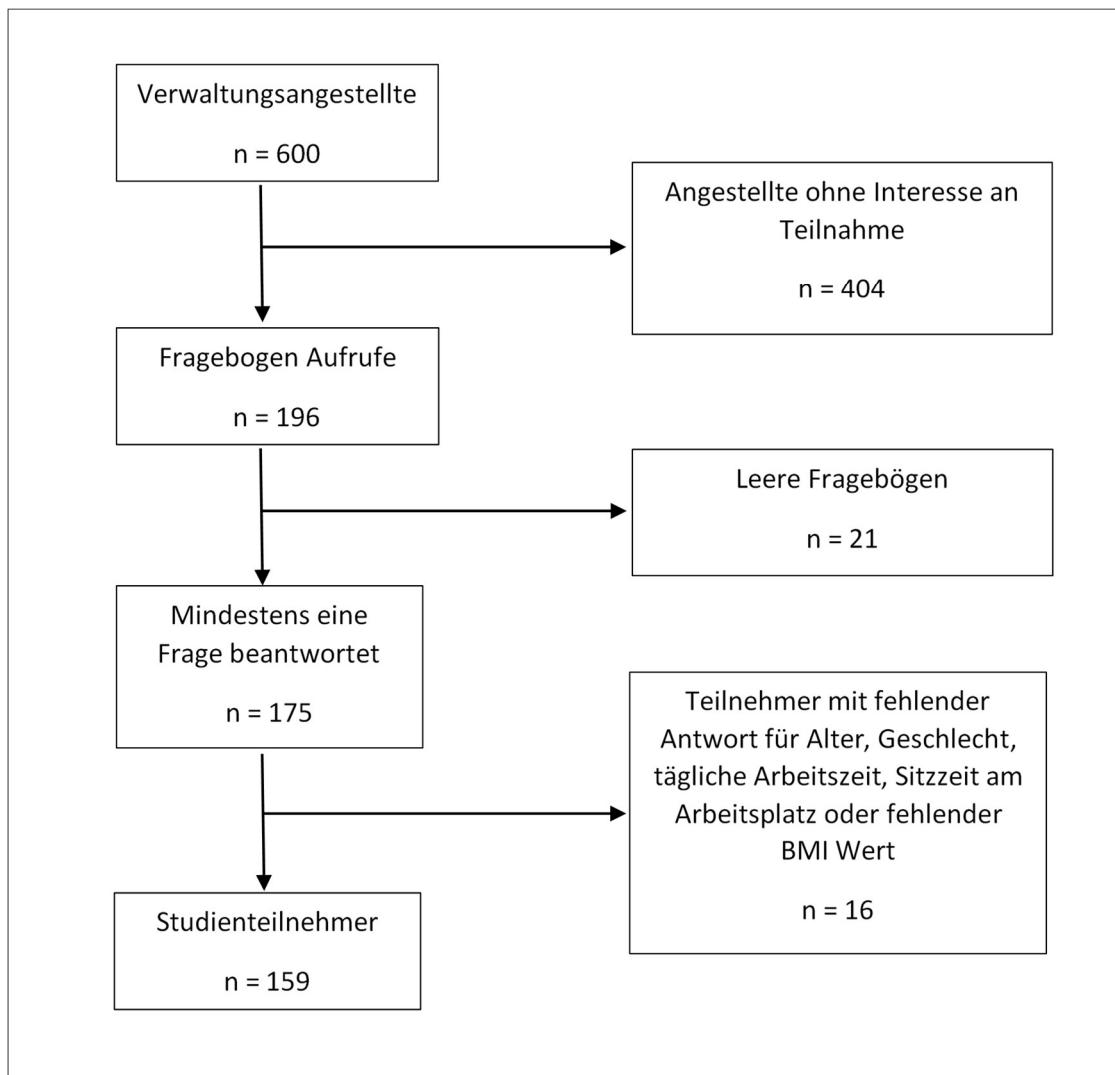

**Onlinematerial 3 Vorhandenes Wissen der Teilnehmenden über die Auswirkungen von sedentärem Verhalten auf die Gesundheit stratifiziert nach Bildungsgruppe.**

**n = 156**

| <b>Bildungsgruppe</b>        | Muskel- und Skelettsystem | Körperliche Fitness | Übergewicht | Herz-Kreislauf-System | Typ 2 Diabetes | Krebs     | Weiß nicht |
|------------------------------|---------------------------|---------------------|-------------|-----------------------|----------------|-----------|------------|
| Niedrig & Andere<br>(n = 35) | 91,4 % (32)               | 71,4 % (25)         | 77,1 % (27) | 57,1 % (20)           | 22,9 % (8)     | 2,9 % (1) | 2,9 % (1)  |
| Mittel<br>(n = 48)           | 98,0 % (47)               | 83,3 % (40)         | 72,9 % (35) | 50,0 % (24)           | 20,8 % (10)    | 4,2 % (2) | 0,0 % (0)  |
| Hoch<br>(n = 73)             | 100,0 % (73)              | 78,1 % (57)         | 78,1 % (57) | 65,8 % (48)           | 26,0 % (19)    | 5,5 % (4) | 0,0 % (0)  |

**Onlinematerial 4 Gewünschte Interventionen der Teilnehmenden stratifiziert nach Bildungsgruppe. n = 156**

|                           | <b>Bildungsgruppe</b>      |                  |                |
|---------------------------|----------------------------|------------------|----------------|
|                           | Niedrig & Andere<br>(n=35) | Mittel<br>(n=48) | Hoch<br>(n=73) |
| Stehpult                  | 54,3 % (19)                | 70,8 % (34)      | 68,5 % (50)    |
| Stehmeeting               | 17,1 % (6)                 | 39,6 % (19)      | 52,1 % (38)    |
| Pop-up                    | 20,0 % (7)                 | 20,8 % (10)      | 32,9 % (24)    |
| Bewegungsvideos           | 22,9 % (8)                 | 10,4 % (5)       | 24,7 % (18)    |
| Reichweite                | 25,7 % (9)                 | 16,7 % (8)       | 19,2 % (14)    |
| Beratung oder Information | 28,6 % (10)                | 16,7 % (8)       | 16,4 % (12)    |
| Sitz-Steh-Schreibtisch    | 17,1 % (6)                 | 22,9 % (11)      | 13,7 % (10)    |
| App                       | 5,7 % (2)                  | 8,3 % (4)        | 17,8 % (13)    |
| Telefonaufkleber          | 0,0 % (0)                  | 8,3 % (4)        | 5,5 % (4)      |
| Betriebliche Angebote     | 8,6 % (3)                  | 2,1 % (1)        | 1,4 % (1)      |
| Angebote für Teams        | 0,0 % (0)                  | 0,0 % (0)        | 4,1 % (3)      |
| Andere                    | 0,0 % (0)                  | 0,0 % (0)        | 6,8 % (5)      |
| Keine Angebote            | 8,6 % (3)                  | 4,2 % (2)        | 5,5 % (4)      |

Onlinematerial 5 Gewünschte Interventionen der Teilnehmenden stratifiziert nach Altersgruppe. n = 159

|                           | 18 – 30 Jahre<br>(n=38) | 31-40 Jahre<br>(n=39) | 41 – 50 Jahre<br>(n=31) | > 50 Jahre<br>(n=51) |
|---------------------------|-------------------------|-----------------------|-------------------------|----------------------|
| Stehpult                  | 73,7 % (28)             | 79,5 % (31)           | 61,3 % (19)             | 54,9 % (28)          |
| Stehmeeting               | 26,3 % (10)             | 43,6 % (17)           | 51,6 % (16)             | 41,2 % (21)          |
| Pop-up                    | 34,2 % (13)             | 30,8 % (12)           | 22,6 % (7)              | 21,6 % (11)          |
| Bewegungsvideos           | 15,8 % (6)              | 28,2 % (11)           | 12,9 % (4)              | 21,6 % (11)          |
| Reichweite                | 18,4 % (7)              | 17,9 % (7)            | 19,4 % (6)              | 23,5 % (12)          |
| Beratung oder Information | 15,8 % (6)              | 17,9 % (7)            | 29,0 % (9)              | 17,6 % (9)           |
| Sitz-Steh-Schreibtisch    | 31,6 % (12)             | 23,1 % (9)            | 6,5 % (2)               | 7,8 % (4)            |
| App                       | 5,3 % (2)               | 7,7 % (3)             | 19,4 % (6)              | 17,6 % (9)           |
| Telefonaufkleber          | 0,0 % (0)               | 2,6 % (1)             | 9,7 % (3)               | 7,8 % (4)            |
| Betriebliche Angebote     | 2,6 % (1)               | 2,6 % (1)             | 3,2 % (1)               | 3,9 % (2)            |
| Angebote für Teams        | 2,6 % (1)               | 2,6 % (1)             | 3,2 % (1)               | 0,0 % (0)            |
| Andere                    | 0,0 % (0)               | 0,0 % (0)             | 3,2 % (1)               | 7,8 % (4)            |
| Keine Angebote            | 0,0 % (0)               | 0,0 % (0)             | 6,5 % (2)               | 13,7 % (7)           |
